# Supplementary material for: Ribonucleotide reductase inhibitors suppress SAMHD1 ara‐CTPase activity enhancing cytarabine efficacy
Source: PubMed Central journal article supplement (PMC7059017; doi:10.15252/emmm.201910419), 2020-01-17
Supplement: EMMM-12-e10419-s005.pdf [file EMMM-12-e10419-s005.pdf]

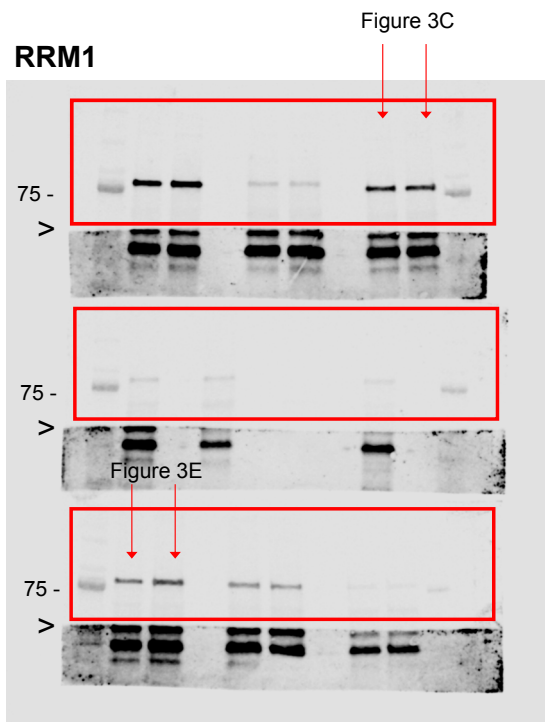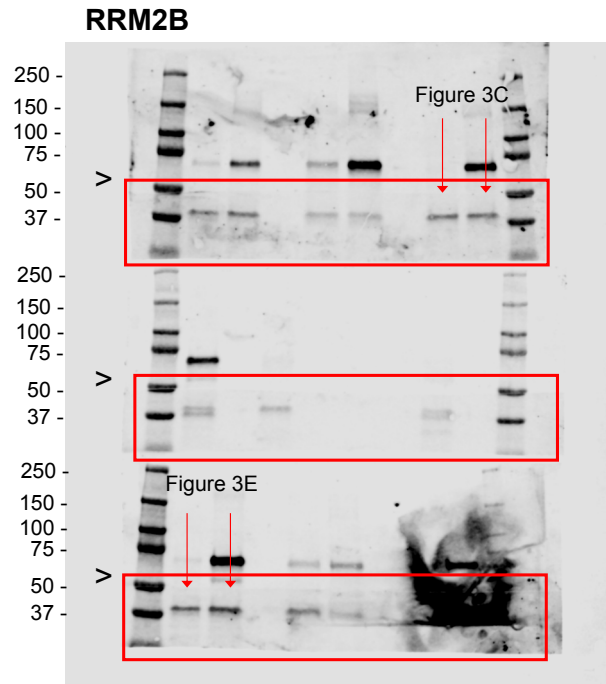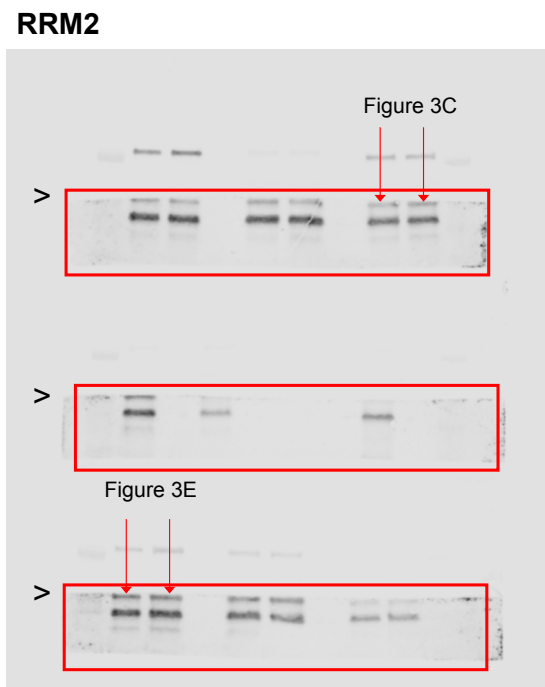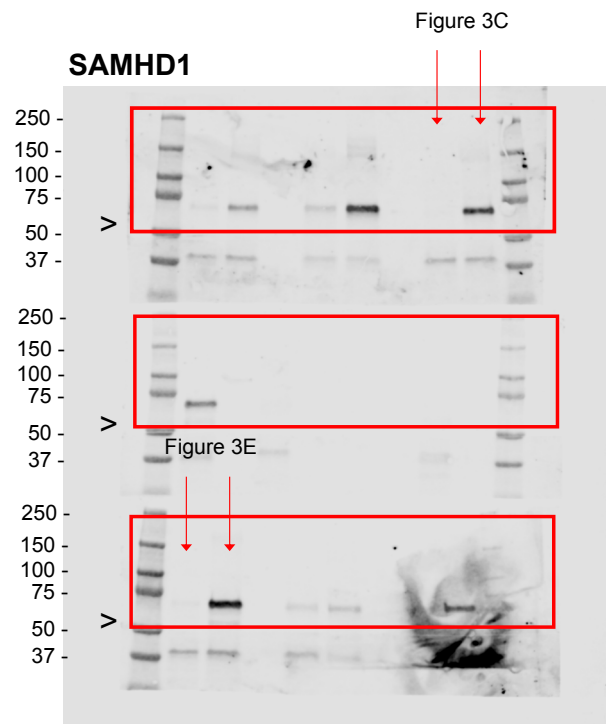

> indicates membrane cut site
